# Supplementary material
Source: MDPI journal article supplement (https://www.mdpi.com/2225-1154/11/5/98)
Supplement: s1 [file s1]

# Connection of Compound Extremes of Air Temperature and Precipitation with Atmospheric Circulation Patterns in Eastern Europe

Olga Sukhonos and Elena Vyshkvarkova \*

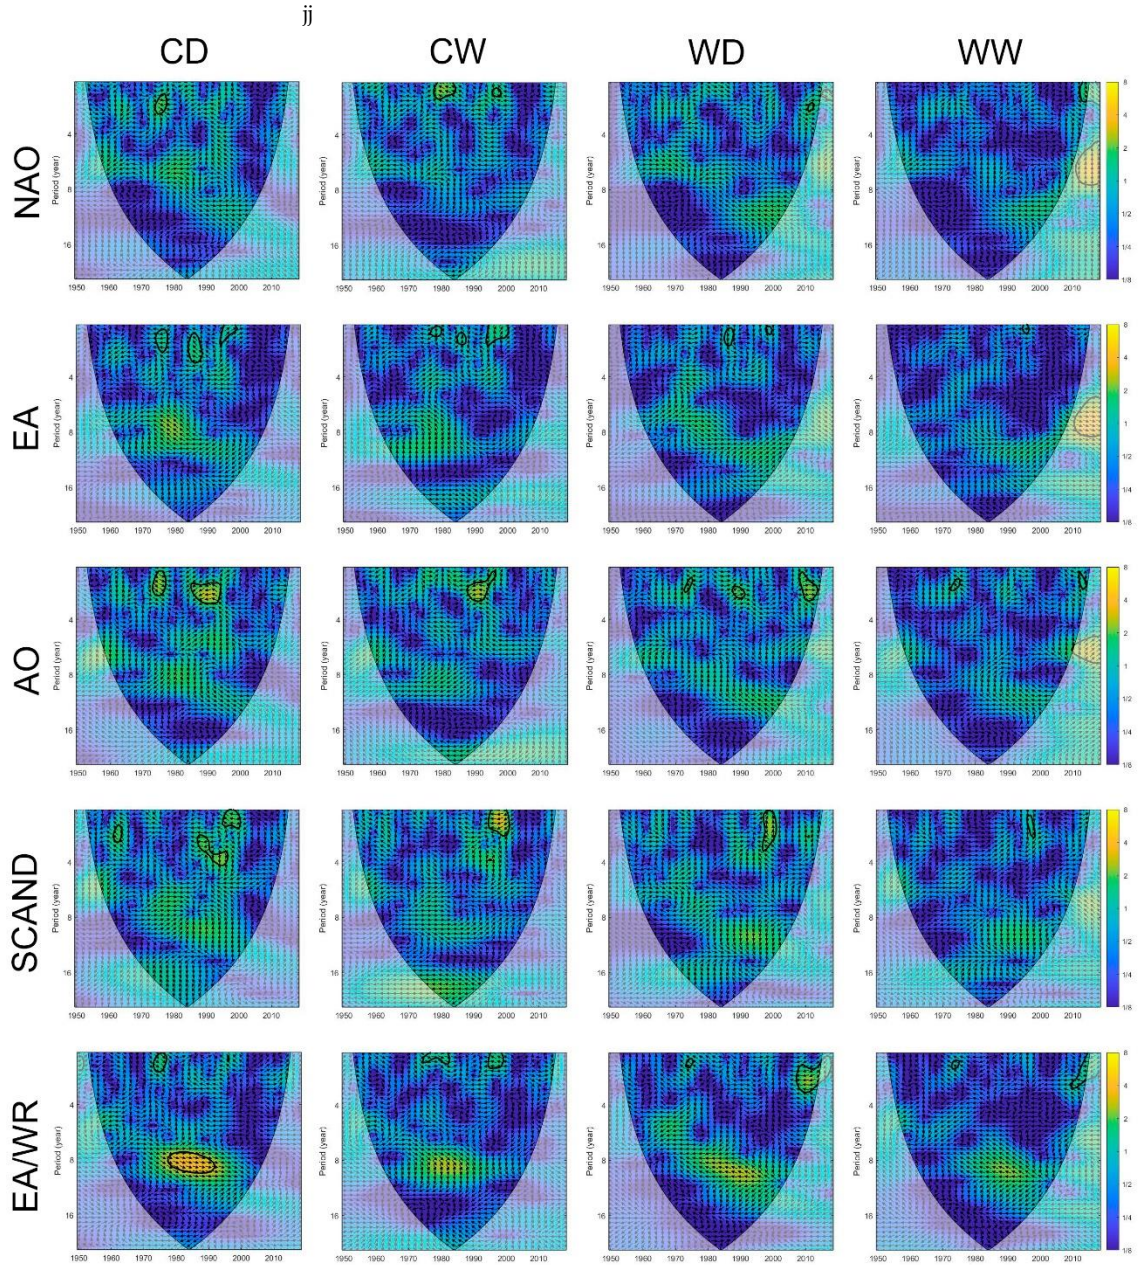

**Figure S1.** Cross wavelet spectrum between compound extreme indices and circulation mode indices for summer season. Thick black contour lines determinate the 5% significance level for red noise. COI, pictures that may distort the edges, are represented in lighter tones. Right (left) pointing arrows show an in-phase (anti-phase) relationship, and vertically downward arrows show that the climate index leads compound extreme index by 90° (one-quarter). Yellow (blue) represents stronger (weaker) power.

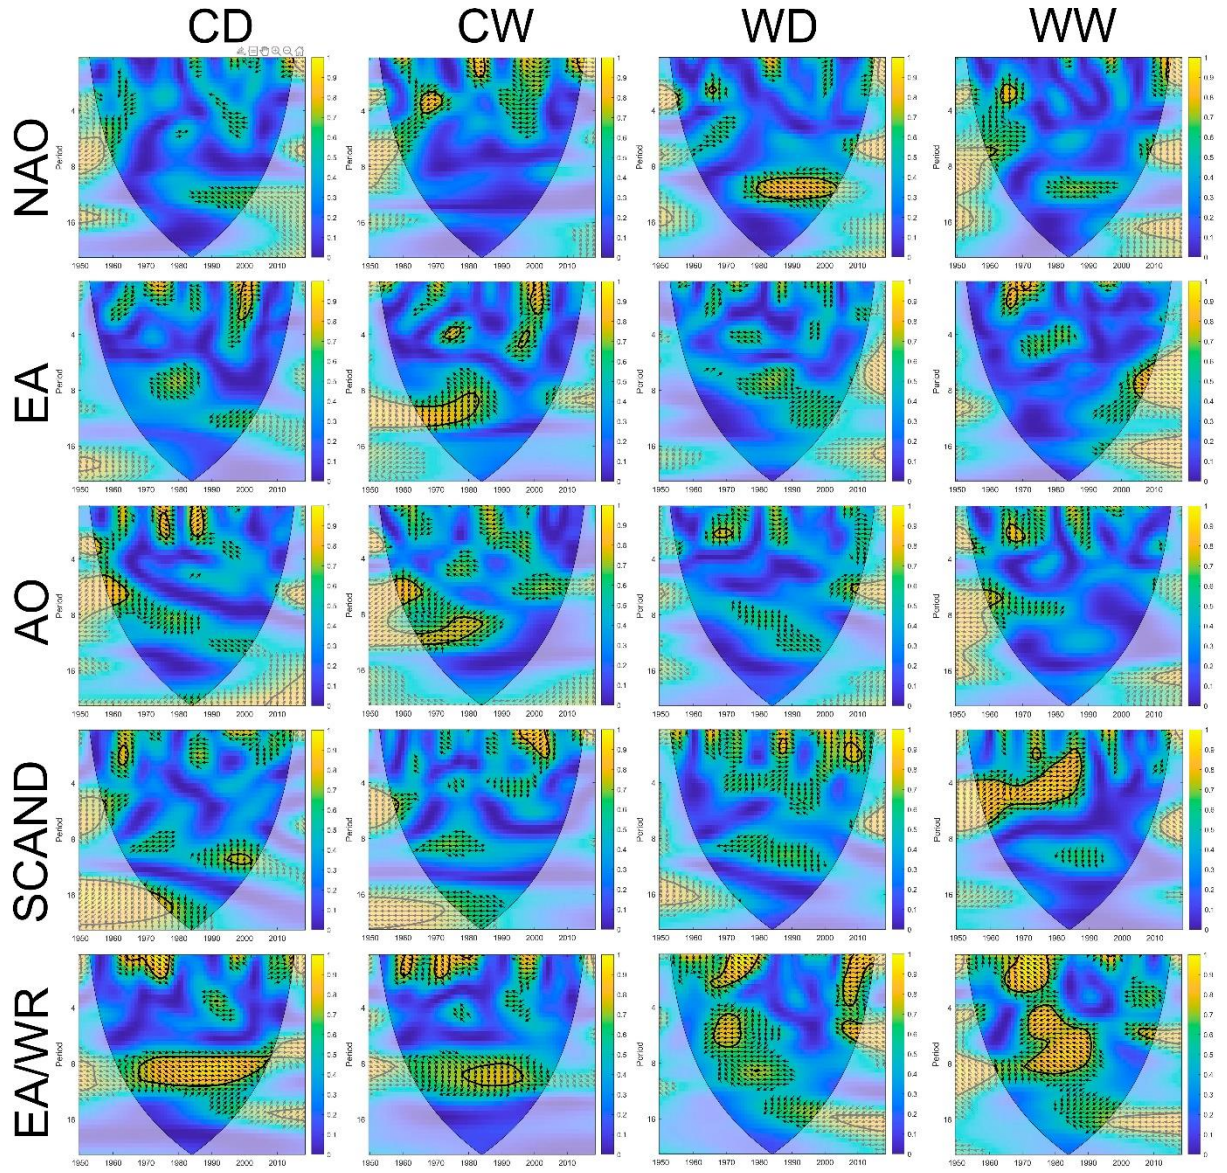

**Figure S2.** Wavelet coherence spectrum between compound extreme indices and circulation modes for summer season. Thick black contour lines delineate the 5% significance level for red noise. COI, pictures that may distort the edges, are represented in brighter tones. Right (left) pointing arrows show an in-phase (anti-phase) relationship, and vertically downward arrows show that the atmospheric mode index leads compound extreme index by 90° (one-quarter). Yellow (blue) represents stronger (weaker) power.
